# Supplementary material for: Implementation of secondary fracture prevention services after hip fracture: a qualitative study using extended Normalization Process Theory
Source: PubMed Central journal article supplement (PMC4470053; doi:10.1186/s13012-015-0243-z), 2015-04-23
Supplement: 13012_2015_243_MOESM1_ESM.pdf [file 13012_2015_243_MOESM1_ESM.pdf]

## **Additional file 1: Interview topic guide: themes and subthemes explored in the interviews**

### **Theme 1**

**Current service provision** – things that work well/ not so well/ improvements/ best way of doing this

- Case finding or identifying those at risk
- Assessing patients 'at risk'
- Treating patients
- Monitoring patients

**Co-ordination of care** - things that work well/ not so well/ improvements/ best way of doing this

- Within hospital services
- With primary care services

### **Theme 2**

**Change in services** - Most significant change in how services to prevent secondary fractures after hip fracture were delivered whilst at the hospital

- How easy/ difficult process was

### **Capability**

- Change in work done
- Access to resources
  - Finances, staffing, technology

### **Capacity**

- How well everyone communicated with each other during the process
- How well everyone worked together to introduce the service

### **Potential**

- How useful YOU thought the service was that was being introduced/ how useful you thought other colleagues felt about the service was that was being introduced

### **Contribution**

- Collection of outcomes data
